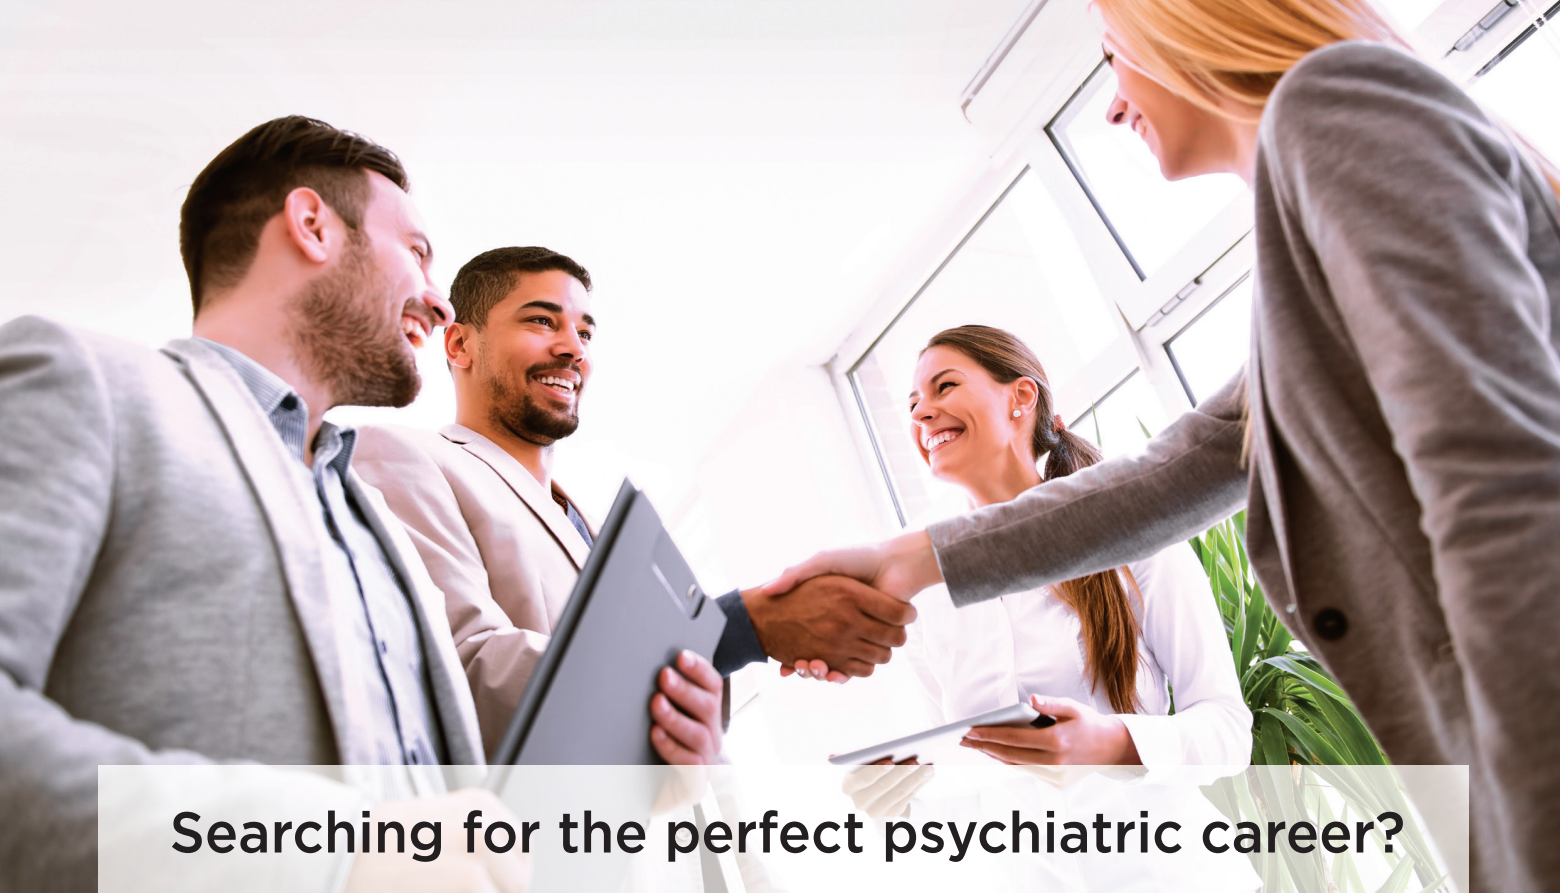

Searching for the perfect psychiatric career?

**Let APA JobCentral help!**

### Manage Your Career

- Browse hundreds of active job listings!
- Create an account to save jobs, store multiple resumes and cover letters and communicate with employers through our internal messaging system.
- Set up multiple job alerts specifying your skills, interests and location to receive e-mails when employers post jobs that match your criteria.

### Recruit for Open Positions

- Post your job in front of thousands of highly qualified psychiatrists.
- Cross promote your job listing in *Psychiatric News*.
- Search the anonymous resume database to find your ideal candidate.

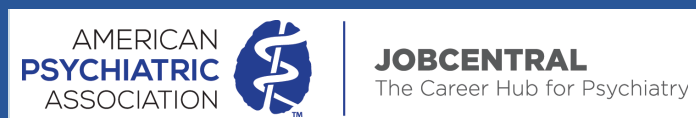

[jobs.psychiatry.org](https://jobs.psychiatry.org)

## Outpatient Adult Psychiatrists

### Minnesota

*Share your expertise in an environment that supports new treatments and innovation while embracing a strong work-life balance.*

HealthPartners is a dynamic multi-specialty medical group practice headquartered in the Twin Cities of Minneapolis/St. Paul, Minnesota. Our Behavioral Health group has a large outpatient practice with 21 adult psychiatrists, 4 child psychiatrists, 7 clinical nurse specialists and 60 therapists. Each has special interests and expertise, but also practice as generalists to provide outstanding clinical care to our diverse patient population via **integrated outpatient services** with our primary care and specialty clinics.

We have exciting practice opportunities for outpatient adult psychiatrists, and provide:

- Full-time and part-time practices
- Competitive pay
- A generous benefits package, including relocation assistance, employer-matched 401(k) and 457(b), malpractice coverage, and competitive PTO and CME
- Minimal call requirements (by pager/phone) covering outpatient practice
- Affiliation with multiple hospitals and clinics including inpatient psychiatry, intensive day programs, chemical dependency programs, and eating disorder programs
- A large internal referral base
- Exceptional nursing support and psychotherapy colleagues
- An organizational commitment to a sustainable medical practice with EHR, documentation efficiency work group, extensive billing and coding support, integrated services and telemedicine

HealthPartners' integrated health care system is recognized locally and nationally for great care and leadership. We believe outstanding health care is delivered when we merge the science of medicine with the compassion, spirit and humanity of our hearts. We refer to this as "**Head + Heart, Together,**" which exists to inspire constant improvement and lasting success. We achieve this by partnering with patients and families in everything from care decisions to service and facility design. As we work together as a unified team, we engage patients, families and the community, and put them at the center of everything we do.

To learn more and apply, visit us online at [healthpartners.com/careers](http://healthpartners.com/careers), or email your CV and cover letter to [lori.m.fake@healthpartners.com](mailto:lori.m.fake@healthpartners.com).

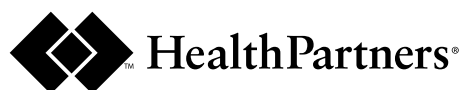

We are an equal opportunity employer and all qualified applicants will receive consideration for employment without regard to race, color, religion, sex, national origin, disability status, protected veteran status, or any other characteristic protected by law.

[healthpartners.com](http://healthpartners.com)

# Understanding Mental Disorders

## Your Guide to DSM-5®

American Psychiatric Association

**A consumer guide for anyone who has  
been touched by mental illness!**

*With Foreword by Patrick J. Kennedy*

Most of us know someone who suffers from a mental illness. This book helps those who may be struggling with mental health problems, as well as those who want to help others achieve mental health and well-being.

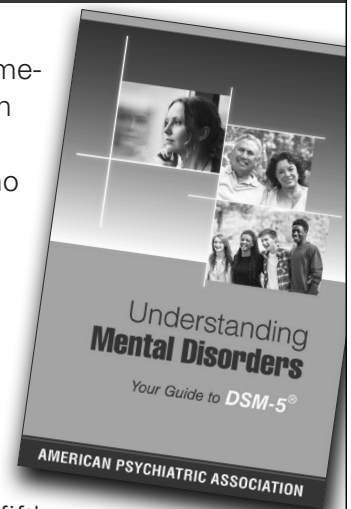

Based on the latest, fifth edition of the *Diagnostic and Statistical Manual of Mental Disorders*—known as DSM-5®—**Understanding Mental Disorders** provides valuable insight on what to expect from an illness and its treatment—and will help readers recognize symptoms, know when to seek help, and get the right care. Featured disorders include depression, schizophrenia, ADHD, autism spectrum disorder, posttraumatic stress disorder, and bipolar disorder, among others.

**2015 • 388 pages • ISBN 978-1-58562-491-1  
Paperback • \$24.95 • Item #62491**

AMERICAN  
PSYCHIATRIC  
ASSOCIATION  
PUBLISHING

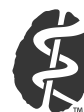

[www.appi.org](http://www.appi.org)

Phone: 703-907-7322

Toll Free: 1-800-368-5777

Email: [appi@psych.org](mailto:appi@psych.org)

**20% Discount • American Psychiatric Association Members  
25% Discount • APA Resident-Fellow Members**

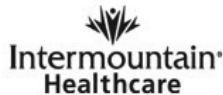

Helping People Live the Healthiest Lives Possible.

Psychiatrists (adult and child),  
Emergency-Access Center & Mental Health  
Integration are currently needed in:  
Bountiful • Logan • Ogden • Park City  
Salt Lake City • St. George  
Medical Director/Department Chair &  
Emergency-Access Center needed in:  
Salt Lake City

Employment with Intermountain Medical Group.  
Competitive salary with transition to production  
and additional income for meeting quality  
goals. Stipend available. Signing bonus and loan  
repayment available. Full Intermountain benefits  
to include defined pension, 401k match & CME.  
Relocation provided up to 15K.

For the second year in a row, Forbes magazine has  
named Intermountain one of the top 3 healthcare  
organizations, a top 25 employer overall.

Contact Intermountain Physician Recruiting.  
800-888-3134 [PhysicianRecruit@imail.org](mailto:PhysicianRecruit@imail.org)  
<http://physicianjobsintermountain.org>

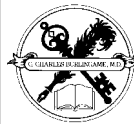

## Call for Nominations

The Institute of Living/Hartford Hospital is pleased  
to announce that nominations are now being accepted  
for the 2018 C. Charles Burlingame Award. This award,  
honoring an outstanding leader in psychiatric education, research or  
administration, is made in the memory of Dr. Burlingame, psychiatrist-  
in-chief from 1931 to 1950.

We invite you to nominate a person who has significantly advanced  
the field of psychiatry. The nomination must include a current curriculum  
vitae and two letters of support describing the candidate's achievements.

The Institute of Living is a comprehensive behavioral health system  
for the evaluation and treatment of psychiatric and addiction disorders.  
We offer a full continuum of services to patients and remain committed to  
the highest standards of clinical care, research and education.

### Past Recipients

|                                       |                                   |
|---------------------------------------|-----------------------------------|
| 1988 Robert Kellner, M.D., Ph.D.      | 2003 Dilip V. Jeste, M.D.         |
| 1989 William T. Carpenter, Jr., M.D.  | 2004 David H. Barlow, Ph.D.       |
| 1990 Dennis P. Cantwell, M.D.         | 2005 Herbert D. Kleber, M.D.      |
| 1991 George E. Vaillant, M.D.         | 2006 Daniel N. Stern, M.D.        |
| 1992 A. John Rush, M.D.               | 2007 Jerrold F. Rosenbaum, M.D.   |
| 1993 John C. Nemiah, M.D.             | 2008 K. Ranga Rama Krishnan, M.D. |
| 1994 Maurice J. Martin, M.D.          | 2009 David J. Kupfer, M.D.        |
| 1995 Otto F. Kernberg, M.D.           | 2010 Professor Sir Michael Rutter |
| 1996 Charles P. O'Brien, M.D., Ph.D.  | 2011 Jeffrey A. Lieberman, M.D.   |
| 1997 Glen Owen Gabbard, M.D.          | 2012 Judith L. Rapoport, M.D.     |
| 1998 Lissy F. Jarvik, M.D., Ph.D.     | 2013 Nora D. Volkow, M.D.         |
| 1999 Nancy C. Andreasen, M.D., Ph.D.  | 2014 Daniel R. Weinberger, M.D.   |
| 2000 Lewis L. Judd, M.D.              | 2015 David A. Brent, M.D.         |
| 2001 Paul S. Appelbaum, M.D.          | 2016 Steven S. Sharfstein, M.D.   |
| 2002 Charles B. Nemeroff, M.D., Ph.D. | 2017 Harold Alan Pincus, M.D.     |

Institute  
of Living

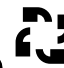

A Division of Hartford Hospital

Nominations should be sent no later  
than January 10, 2018 to:  
Harold I. Schwartz, M.D.  
HHC Regional VP, Behavioral Health  
Psychiatrist-in-Chief  
The Institute of Living/Hartford Hospital  
200 Retreat Ave., Hartford, CT 06106  
or e-mailed to  
[Kathleen.Day@hhchealth.org](mailto:Kathleen.Day@hhchealth.org)

## Psychiatrist Opportunities

Philadelphia, PA

Einstein Behavioral Health is a comprehensive treatment facility in  
Philadelphia, Pennsylvania. We are seeking:

- Medical Director, Behavioral Health Service
- FT Psychiatrist for General Adult Inpatient Psychiatry Unit
- Geropsychiatrist
- CRC Medical Director

Our programs offer a full range of adult inpatient mental health  
services, including an alcohol and chemical dependency treatment  
unit and a geriatric diagnostic center. Our full continuum of care also  
includes intensive outpatient programs, partial hospitalization  
programs and an outpatient medication management clinic.

This opportunity includes an innovative, competitive compensation  
model and an excellent working environment as a member of a  
large, experienced behavioral medicine team.

Einstein Behavioral Health offers programs to address behavioral  
health issues for all ages. Our 36-bed Long Term Structured  
Residence (LTSR) services both adults and older adults, and our  
Adult Crisis Response Center (CRC) is a crisis/emergency  
psychiatry facility. Our Child and Adolescent Crisis Response Center  
includes a full range of services for children and adolescents.

We are part of Einstein Healthcare Network, a large, comprehensive  
healthcare network, and have a long history of providing excellent  
patient care and a high level of physician satisfaction.

For more information, please contact  
**Kim Hannan, Physician Recruiter,**  
[HannanKi@einstein.edu](mailto:HannanKi@einstein.edu) or call  
267-421-7435.

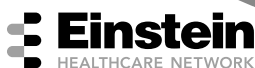

EOE

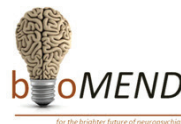

**BioMend (Bioelectronic Medicine for  
Neuropsychiatric Disorders) Research Fellowship**

**The Zucker Hillside Hospital  
Hofstra Northwell School of Medicine**

Neuromodulatory approaches including TMS (Transcranial Magnetic  
Stimulation), tDCS (transcranial Direct Current Stimulation), DBS  
(Deep Brain Stimulation) as well as ECT (Electroconvulsive Therapy)  
are gaining increased clinical and research attention in the treatment  
of severe mental illness. The Zucker Hillside Hospital has recently  
established the *BioMend* (Bioelectronic Medicine for Neuropsychiatric  
Disorders) Center to conduct cutting edge clinical, and research work  
focused on these non-pharmacological treatment strategies.

A combined *BioMend* Clinical and Research Fellowship is now available  
beginning July 1, 2018 for individuals interested in attaining expertise  
in this rapidly developing field. The Zucker Hillside Hospital is currently  
the clinical center for more than 6000 treatments/year with ECT, TMS  
and tDCS and is conducting a number of research studies focused on  
the interindividual variation in response to ECT, TMS and tDCS  
treatment. Our multidisciplinary team provides comprehensive  
research opportunities in understanding the underlying neurobiology  
behind these approaches. Research approaches include basic clinical  
and neurocognitive studies, EEG and neuroimaging measures, as  
well as more invasive techniques using iEEG (intracranial EEG) and  
ECoG (Electrocorticography) in human subjects. Fellows will have the  
opportunity to gain clinical expertise with these modalities as well as  
to conduct innovative clinical, neurophysiological and neuroimaging  
research. We offer education and hands-on involvement in all phases  
of research design, implementation, data analysis, grant writing, and  
publication. Fellows must have completed a psychiatry residency.

Please send CV and letter of inquiry to:  
**Anil K. Malhotra, M.D.**  
Director of Research, Psychiatry Research  
The Zucker Hillside Hospital  
e-mail: [AMalhotra@northwell.edu](mailto:AMalhotra@northwell.edu)

**The Zucker Hillside Hospital is an equal opportunity employer.**

## Subscription and Business Information

*The American Journal of Psychiatry*, ISSN 0002-953X, is published monthly by the American Psychiatric Association.

The American Psychiatric Association does not hold itself responsible for statements made in its publications by contributors or advertisers. Unless so stated, material in *The American Journal of Psychiatry* does not reflect the endorsement, official attitude, or position of the American Psychiatric Association or of the Journal's Editorial Board.

Periodicals postage paid at Arlington, VA, and additional mailing offices. POSTMASTER: Send address changes to *The American Journal of Psychiatry*, Circulation Department, American Psychiatric Association, 1000 Wilson Blvd., Suite 1825, Arlington, VA 22209-3901.

### Editorial Office

*American Journal of Psychiatry*  
American Psychiatric Association  
1000 Wilson Blvd., Suite 1825  
Arlington, VA 22209-3901  
Phone: (703) 907-7885, (703) 907-7889  
E-mail: [ajp@psych.org](mailto:ajp@psych.org)

### Customer Service

Phone: (800) 368-5777 (toll-free)  
E-mail: [appi@psych.org](mailto:appi@psych.org)

### APA Member Subscription Services

Phone: (888) 35-PSYCH (toll-free)

### Subscriptions

Per year: individual \$318.00,  
international \$478.00

Institutional subscriptions are tier priced. For institutional site license or pricing information, contact (703) 907-8538 or [institutions@psych.org](mailto:institutions@psych.org).

*Additional subscription options, including single issues and student rates*

Contact Customer Service

### Advertising

*Pharmaceutical Print and Online Advertising*  
Frank Cox, Kathleen Harrison, Tim Wolfinger  
Pharmaceutical Media, Inc.  
30 East 33rd Street  
New York, NY 10016  
Phone: (212) 904-0379  
E-mail: [twolfinger@pminy.com](mailto:twolfinger@pminy.com)

*Nonpharmaceutical and Online Sales*

Eamon Wood  
Pharmaceutical Media, Inc.  
E-mail: [ewood@pminy.com](mailto:ewood@pminy.com)  
(see address and phone above).

### Permissions and Reprints

Material published in the journals of the American Psychiatric Association and American Psychiatric Association Publishing is protected by copyright and all rights are reserved. Material may not be reproduced in any form or by any means without written permission from the copyright owner. For permission to reproduce material published by APA, please visit [http://www.appi.org/Customer\\_Service/Pages/Permissions.aspx](http://www.appi.org/Customer_Service/Pages/Permissions.aspx) for more information. Permission can also be secured through the Copyright Clearance Center ([www.copyright.com](http://www.copyright.com)).

APA does not require that permission be obtained for the photocopying of isolated articles for nonprofit classroom or library reserve use; all fees associated with such permission are waived. This consent does not extend to other kinds of copying, such as copying for general distribution, for advertising or promotional purposes, for creating new collective works, or for resale. Requests for commercial distribution should be directed to (703) 907-7889.

For bulk reprints, please contact Jane Cha, (703) 907-7889; email: [jcha@psych.org](mailto:jcha@psych.org).

Indexed in Abstracts for Social Workers, Academic Abstracts, Biological Abstracts, Chemical Abstracts, Chicago Psychoanalytic Literature Index, Cumulative Index to Nursing Literature, Excerpta Medica, Hospital Literature Index, Index Medicus, International Nursing Index, Nutrition Abstracts, Psychological Abstracts, Science Citation Index, Social Science Source, and Social Sciences Index.

Pages are produced by Sheridan Journal Services (Waterbury, VT) and printed by Sheridan NH (Hanover, NH) on acid-free paper effective with Volume 169, Number 1, January 2012.

© 2017 American Psychiatric Association.

# Subscribe today to the highest ranked mental health journal in the Health Policy & Services category!\*

## ▶ Don't miss the October issue:

- Understanding the costs of integrated care models from a CMHC perspective
- A survey of child psychiatrists on mental health crisis management for youths with autism spectrum disorder
- Aligning terminology to be in step with recovery-oriented mental health
- APA 2016–2017 Achievement Awards: outstanding programs

## ▶ Coming in the November issue:

- Using digital media advertising to encourage help seeking in early psychosis intervention
- A qualitative study of involuntary hospital admission experiences
- SOAR disability application outcomes among homeless adults
- MOMCare collaborative care for perinatal depression: costs and benefits

## ▶ One low price covers your print and online subscription.

\$ 115 APA Member print and online subscription

\$ 105 APA Member online-only subscription

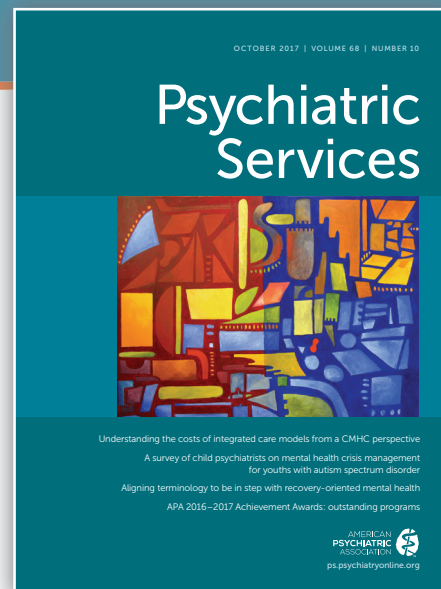

**PSYCHIATRIC  
SERVICES**  
FROM PAGES  
TO PRACTICE

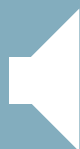

Listen to our podcast,  
***Psychiatric Services From Pages to Practice!***

[ps.psychiatryonline.org](http://ps.psychiatryonline.org)

Subscribe today at [www.appi.org](http://www.appi.org) or call  
Customer Service at 1-800-368-5777.

\*By its most recent Impact Factor (2.888), *Psychiatric Services* is the highest ranked mental health services journal in the Health Policy & Services Category of ISI's Journal Citation Reports. Of the 77 peer-reviewed journals included in the Health Policy & Services Category, *Psychiatric Services* ranks 8th.

AMERICAN  
PSYCHIATRIC  
ASSOCIATION  
PUBLISHING

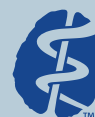

[www.appi.org](http://www.appi.org)

# We've got you covered.

For over 30 years, we have provided psychiatrists with exceptional protection and personalized service. We offer comprehensive insurance coverage and superior risk management support through an "A" rated carrier.

## ANNOUNCING NEW ENHANCEMENTS TO THE AMERICAN PSYCHIATRIC ASSOCIATION PSYCHIATRISTS' PROFESSIONAL LIABILITY PROGRAM:

- **Defense Expenses related to Licensing Board Hearings and Other Proceedings:** Increased Limit to \$50,000 per proceeding with NO annual aggregate (higher limits are available up to \$150,000)
- **Fire Legal Liability Coverage:** Limit of liability increased to \$150,000 for fire damage to third party property
- **Emergency Aid Coverage:** Reimbursement up to \$15,000 in costs and expenses for medical supplies
- Insured's **Consent to Settle** is now required in the settlement of any claim – No arbitration clause!
- **First Party Assault and Battery Coverage:** Up to \$25,000 reimbursement for medical expenses related to injuries and/or personal property damage caused by a patient or client
- **Medical Payments Coverage:** Increased limit to \$100,000 for Medical Payments to a patient or client arising from bodily injury on your business premises

## IN ADDITION WE CONTINUE TO OFFER THE FOLLOWING MULTIPLE PREMIUM DISCOUNTS:

- **50% Resident-Fellow Member Discount**
- **Up to 50% New Doctor Discount** (for those who qualify)
- **50% Part Time Discount** for up to 20 client hours a week or less
- **10% New Policyholder Discount** (must be claims free for the last 6 months)
- **15% Child and Adolescent Psychiatrist Discount** for those whose patient base is more than 50% Children and Adolescents
- **10% Claims Free Discount** for those practicing 10 years, after completion of training, and remain claims free
- **5% Risk Management Discount** for 3 hours of CME

*(Above Coverage Features and Discounts are subject to individual state approval)*

Visit us at [apamalpractice.com](http://apamalpractice.com) or call **877.740.1777** to learn more.

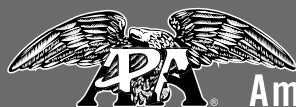

**American Professional Agency**

LEADERS IN PSYCHIATRIC MEDICAL LIABILITY INSURANCE

ENDORSED BY THE  
AMERICAN PSYCHIATRIC  
ASSOCIATION
