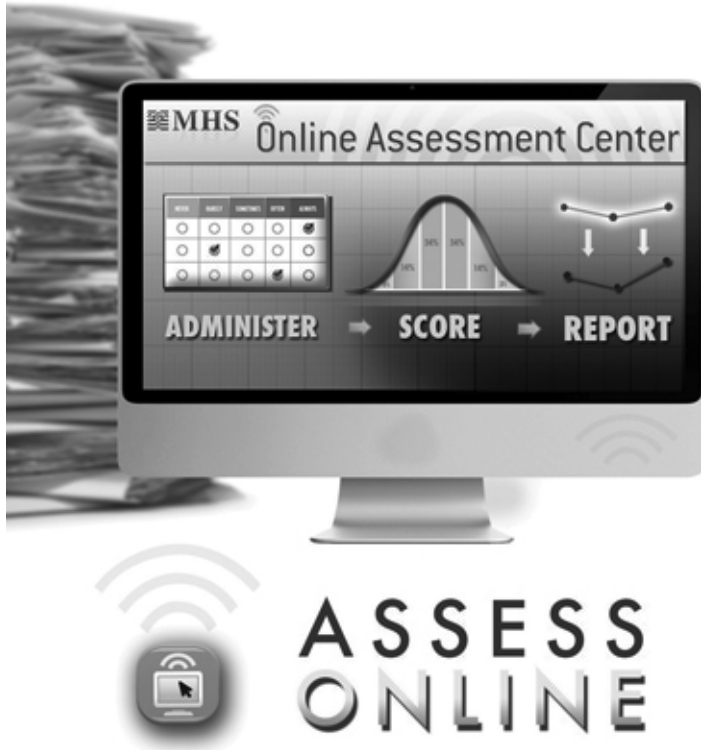

**Access a wide range of MHS Assessments on a secure, easy to use website.**

**Time to Assess and Score**

| Method    | Time           |
|-----------|----------------|
| Handscore | 8 hrs & 20 min |
| Software  | 2 hrs & 5 min  |
| Online    | Only 25 min    |

- Administration and scoring time to complete 25 Connors 3™ Parent or Teacher Forms.

**The MHS Online Assessment Center** provides busy professionals the ability to administer, score and generate reports on a wide range of MHS assessments, with just a click of a button.

All you need to get started is access to a computer, tablet, or smartphone with the internet. Generate full reports without delay through automated scoring with no data entry or software uploads.

This means more time with your clients and less time waiting for information to be entered.

- Safe & Secure**  
 Meets and exceeds HIPPA, FERPA, and PIPEDA requirements.
- Save Time**  
 Fast, easy, and accurate administration with automated scoring.
- Tailored Organization**  
 Data can be customized to how you work.

**MHS**  
ASSESSMENTS

USA Tel: 1.800.456.3003 / CAN Tel: 1.800.268.6011  
 mhs.com • customerservice@mhs.com

**FREE TRIAL** Sign up at  
[MHS.com/onlineassessments](http://MHS.com/onlineassessments)

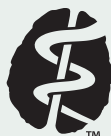

# The American Journal of Psychiatry

Official Journal of the American Psychiatric Association

## Officers 2017–2018

### President

Anita S. Everett, M.D.

### President-Elect

Altha J. Stewart, M.D.

### Treasurer

Bruce J. Schwartz, M.D.

### Secretary

Philip R. Muskin, M.D., M.A.

### Assembly

#### Speaker

Theresa M. Miskimen, M.D.

#### Speaker-Elect

James R. Batterson, M.D.

#### Recorder

Steven R. Daviss, M.D.

### Office of the CEO and Medical Director

#### CEO and Medical Director

Saul Levin, M.D., M.P.A.

### Board of Trustees

Jeffrey Akaka, M.D.

Lama Bazzi, M.D.

Renée L. Binder, M.D.

Jenny Boyer, M.D., Ph.D., J.D.

Ronald M. Burd, M.D.

Tanuja Gandhi, M.D.

Jeffrey L. Geller, M.D., M.P.H.

Uchenna B. Okoye, M.D., M.P.H.

Maria A. Oquendo, M.D., Ph.D.

Roger Peele, M.D.

Vivian B. Pender, M.D.

Paul Summergrad, M.D.

Richard F. Summers, M.D.

Ramaswamy Viswanathan, M.D., D.M.Sc.

Melinda Young, M.D.

## Editorial Board

### Editor

Robert Freedman, M.D.

### Deputy Editors

David A. Lewis, M.D.

Robert Michels, M.D.

Daniel S. Pine, M.D.

A. John Rush, M.D.

Susan K. Schultz, M.D.

Carol A. Tamminga, M.D.

### Associate Editors

Alan Brown, M.D., M.P.H.

Tyrone Cannon, Ph.D.

Benjamin G. Druss, M.D., M.P.H.

Felton Earls, M.D.

Graham J. Emslie, M.D.

Yasmin Hurd, Ph.D.

Joan L. Luby, M.D.

Constantine G. Lyketsos, M.D., M.H.S.

Helen S. Mayberg, M.D., F.R.C.P.C.

Terrie E. Moffitt, Ph.D.

Rajesh Narendran, M.D.

Roy Perlis, M.D.

Anita Thapar, M.B.B.Ch., F.R.C.Psych.,

Ph.D., F.Med.Sci.

Mauricio Tohen, M.D., Dr.PH., M.B.A.

Eduard Vieta, M.D., Ph.D.

Katherine L. Wisner, M.D., M.S.

Xin Yu, M.D.

### Editor Emerita

Nancy C. Andreasen, M.D., Ph.D.

### Former Editors

Amariah Brigham, M.D., 1844–1849

T. Romeyn Beck, M.D., 1849–1854

John P. Gray, M.D., 1854–1886

G. Alder Blumer, M.D., 1886–1894

Richard Dewey, M.D., 1894–1897

Henry M. Hurd, M.D., 1897–1904

Edward N. Brush, M.D., 1904–1931

Clarence B. Farrar, M.D., 1931–1965

Francis J. Braceland, M.D., 1965–1978

John C. Nemiah, M.D., 1978–1993

### Editorial Staff

#### Executive Editor

Michael D. Roy

#### Senior Editors

John J. Guardiano, Ph.D.

Jane Weaver

#### Production Manager

Susan Westrate

#### Assistant Editor

Angela Moore

#### Online Content Manager

Michael Pogachar

#### Editorial Support Services Manager

Heidi Koch

#### Editorial Assistant

Linda LaCour

#### Editorial Assistant/ Permissions Coordinator

Efrem Tuquabo

#### Spanish Content Manager

Sergi Casals, M.A.

#### Assistants to the Editors

Lois Lilienthal

Laura English

Rachel Hogg

Russell A. Scholl

### Interim Publisher

John McDuffie

# Your patients have questions about generics.

**Will they work the same?**

**Why do they look different?**

**Why do they cost less?**

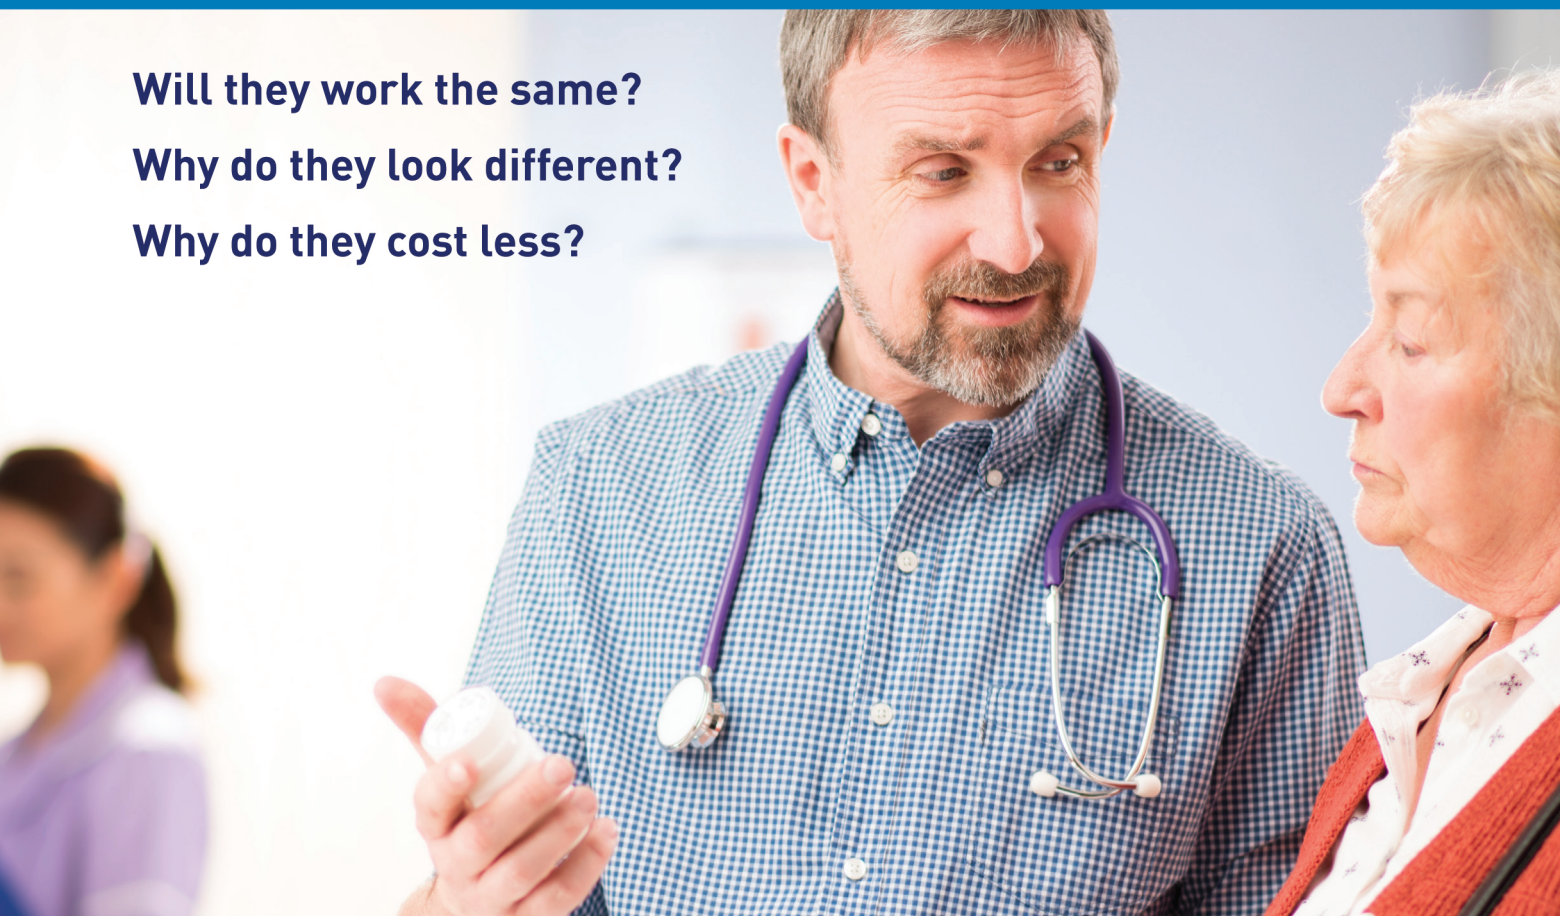

## Let FDA help you with the answers.

FDA follows a rigorous review process of testing and monitoring generics and inspecting manufacturing facilities to ensure they have the same safety, efficacy, and quality as brand-name medications.

**Talk to your patients about generics.**

**You can help them trust the medications you prescribe.**

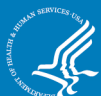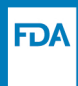

**U.S. FOOD & DRUG  
ADMINISTRATION**

[www.fda.gov/GenericDrugs](http://www.fda.gov/GenericDrugs)

## PERSPECTIVES

### EDITORIALS

#### 913 The Evolution of Meta-Analysis in Psychotherapy Research

*Barbara Milrod, M.D.*

#### 915 From Epidemiology to Interventions and Back

*Carlos Blanco, M.D., Ph.D., et al.*

#### 917 For Women With PMDD, Acute Changes in Ovarian Steroids, But Not Enduring Higher Levels, Precipitate Symptoms

*Barbara L. Parry, M.D.*

#### 920 Clozapine Reduces All-Cause Mortality

*John M. Kane, M.D.*

### CLINICAL CASE CONFERENCE

#### 922 Misleading Guidance From Pharmacogenomic Testing

*Tahir Rahman, M.D., et al.* CME • AUDIO

**Clinical Guidance:** Results of currently available pharmacogenomic tests for mental disorders lack robust, controlled data to support their purported therapeutic recommendations. Results from these tests may be sometimes misleading or even harmful.

### PERSPECTIVES IN GLOBAL MENTAL HEALTH

#### 925 A Muslim Graduate Student From Sudan Trapped by the Travel Ban

*Rania Awaad, M.D.*

**Clinical Guidance:** The U.S. Executive Order banning entry of individuals from seven Muslim-majority countries compounds previous traumas and divides families. Helpful clinical interventions include cultural sensitivity training for clinicians and support groups with individuals similarly affected.

### REVIEWS AND OVERVIEWS

#### 927 Sixty Years of Placebo-Controlled Antipsychotic Drug Trials in Acute Schizophrenia: Systematic Review, Bayesian Meta-Analysis, and Meta-Regression of Efficacy Predictors

*Stefan Leucht, M.D., et al.*

**Clinical Guidance:** Drug trials over six decades confirm the efficacy of antipsychotics, but only about one-fourth of patients have a “good” response to them. Differences between active drug and placebo have grown smaller over time, but the change is due to increasing placebo response; drug response has remained stable.

## NEW RESEARCH

### ARTICLES

#### 943 Psychodynamic Therapy: As Efficacious as Other Empirically Supported Treatments? A Meta-Analysis Testing Equivalence of Outcomes

*Christiane Steinert, Ph.D., et al.* EDITORIAL • CME • AUDIO • VIDEO

**Clinical Guidance:** The effects of psychodynamic therapy on target symptoms are equivalent to those of cognitive-behavioral therapy in depression and several other psychiatric disorders. Psychodynamic therapy provides an evidence-supported alternative when other treatment is inadequate.

## Articles, continued

### 954 The Protective Effect of Pregnancy on Risk for Drug Abuse: A Population, Co-Relative, Co-Spouse, and Within-Individual Analysis

Kenneth S. Kendler, M.D., et al. EDITORIAL • AUDIO

**Clinical Guidance:** Drug abuse substantially declines in many pregnant women, and the association appears to be causal. Similar protective effects are present in the immediate postpartum period.

### 963 Genetic Heterogeneity in Depressive Symptoms Following the Death of a Spouse: Polygenic Score Analysis of the U.S. Health and Retirement Study

Benjamin W. Domingue, Ph.D., et al. VIDEO

**Clinical Guidance:** Genetic predisposition can buffer against depressive symptoms following death of a spouse. Older adults with a higher genetic propensity for subjective well-being, or a lower genetic propensity for depression, have fewer depressive symptoms after their spouse's death.

### 971 State-Independent and Dependent Neural Responses to Psychosocial Stress in Current and Remitted Depression

Qingsen Ming, M.D., Ph.D., et al.

**Clinical Guidance:** Stress in patients with remitted depression induces some of the same brain dysfunctions that occur in patients with current depression. State-dependent compensatory mechanisms are suggested by dorsolateral prefrontal cortex and bilateral striatum hyperactivation in remitted, but not current, depression.

### 980 Premenstrual Dysphoric Disorder Symptoms Following Ovarian Suppression: Triggered by Change in Ovarian Steroid Levels But Not Continuous Stable Levels

Peter J. Schmidt, M.D., et al. EDITORIAL • AUDIO

**Clinical Guidance:** Symptoms of premenstrual dysphoric disorder (PMDD) occur when estradiol and progesterone levels change from low to high, but not with continuously high levels. Thus, PMDD symptoms may respond to treatment strategies that attenuate changes in ovarian steroid levels, such as continuous oral contraceptive or dutasteride.

### 990 Mortality and Self-Harm in Association With Clozapine in Treatment-Resistant Schizophrenia

Theresa Wimberley, Ph.D., et al. EDITORIAL • CME • AUDIO

**Clinical Guidance:** Patients with treatment-resistant schizophrenia who receive clozapine have lower mortality than those receiving no antipsychotic medication. Clozapine-treated patients also have lower rates of self-harm than patients receiving antipsychotics other than clozapine.

## COMMUNICATIONS AND UPDATES

### LETTERS TO THE EDITOR

#### 999 What About Fetal Alcohol Exposure?

Carl C. Bell, M.D., Radhika Chimata, M.A., M.D.

#### 999 Broader Focus Required to Understand the Effects of the Perinatal Environment on Child Neurodevelopment: Response to Bell and Chimata

Kieran J. O'Donnell, Ph.D., Michael J. Meaney, Ph.D.

#### 1000 Are Personality Disorders Assessed in Young People?

Christopher C. Conway, Ph.D., et al.

#### 1001 Recurrent Benzodiazepine Withdrawal Catatonia in an Older Adult

Lindsay G. Lebin, M.D., Joseph M. Cerimele, M.D., M.P.H.

### BOOK FORUM

#### 1003 Hearing Voices: The History of Psychiatry in Ireland

John S. McIntyre, M.D.

#### 1004 The Finest Traditions of My Calling: One Physician's Search for the Renewal of Medicine

Michael Redinger, M.D., M.A.

Book Forum, continued

1005 Books Received

## OFFICIAL ACTIONS

1006 APA Council Reports

## OTHER ITEMS OF INTEREST

1023 Continuing Medical Education

A6 Chairpersons of APA Councils, Committees, and Task Forces

A14 Subscription and Business Information

**Cover:** As findings accumulate from genome-wide association studies, scientists are beginning to examine moderators of these associations. Rather than examining the genetic factors that could influence vulnerability to depression following a stressor, Domingue and colleagues (p. 963) examined the way in which genetic factors could protect against depression following a significant life stressor, death of a spouse. (Images by Kentoh and Rawpixel, Shutterstock.com)

Article content that addresses **Core Competencies**, defined by the Accreditation Council of Graduate Medical Education and the American Board of Medical Specialties, is indicated by the following symbols:

-  Professionalism
-  Patient Care and Procedural Skills
-  Medical Knowledge
-  Practice-Based Learning and Improvement
-  Interpersonal and Communication Skills
-  Systems-Based Practice.

More information is available at <http://www.abms.org/board-certification/a-trusted-credential/based-on-core-competencies/>

### La Tabla de Contenidos de Este Número Está Disponible en Español

*(This issue's Table of Contents are available in Spanish)  
(Abstracts are also available in Spanish)*

Translation presented in collaboration with the Office of Global Health, Rutgers-Robert Wood Johnson Medical School

Support for this effort provided by ACTA Colombia.

#### Translation courtesy of

**Sergi Casals, M.A.**

Garuna, Medellin, Colombia ([www.garunaeditors.com](http://www.garunaeditors.com))

**Carlos Lopez Jaramillo, M.D.**

Universidad de Antioquia, Medellin, Colombia

**Javier I. Escobar, M.D., M.Sc.**

Rutgers-Robert Wood Johnson Medical School

**AUDIO** Highlighted in AJP Audio, a downloadable .mp3 file available at [ajp.psychiatryonline.org](http://ajp.psychiatryonline.org)

**CME** A course covering the content of this article is available online for paid subscribers to the AJP CME Course program

**EDITORIAL** Discussed in one of the issue's editorials

**VIDEO** Highlighted online by Deputy Editor Daniel S. Pine, M.D.

# THE AMERICAN PSYCHIATRIC ASSOCIATION

1000 Wilson Blvd., Suite 1825, Arlington, VA 22209-3901  
(888) 357-7924 (toll-free inside the U.S. and Canada) / (703) 907-7300  
web site: [www.psychiatry.org](http://www.psychiatry.org) • e-mail: [apa@psych.org](mailto:apa@psych.org)

## Chairpersons of Councils, Committees, and Task Forces

### Standing Committees

|                             |                               |
|-----------------------------|-------------------------------|
| <b>Bylaws</b>               | Esperanza Diaz, M.D.          |
| <b>Elections</b>            | Barry K. Herman, M.D.         |
| <b>Ethics</b>               | Ezra Griffith, M.D.           |
| <b>Finance and Budget</b>   | Alan F. Schatzberg, M.D.      |
| <i>Audit</i>                | Bruce J. Schwartz, M.D.       |
| <i>Investment Oversight</i> | David Fassler, M.D.           |
| <b>Joint Reference</b>      | Altha J. Stewart, M.D.        |
| <b>Membership</b>           | Rahn K. Bailey, M.D.          |
| <b>Nominating</b>           | Maria A. Oquendo, M.D., Ph.D. |
| <b>Tellers</b>              | Jose Vito, M.D.               |

### Non-Standing Committee

|                             |                              |
|-----------------------------|------------------------------|
| <b>Conflict of Interest</b> | Philip R. Muskin, M.D., M.A. |
|-----------------------------|------------------------------|

### Councils

#### Council on Addiction Psychiatry

Andrew J. Saxon, M.D.

#### Council on Advocacy and Government Relations

Patrick S. Runnels, M.D.

*Advocacy and Litigation Funding*

Bhasker J. Dave, M.D.

#### Council on Children, Adolescents, and Their Families

Joseph V. Penn, M.D.

#### Council on Communications

Christopher A. (Drew) Ramsey, M.D.

#### Council on Geriatric Psychiatry

Robert P. Roca, M.D.

#### Council on Healthcare Systems and Financing

Harsh K. Trivedi, M.D.

*Integrated Care*

Lori E. Raney, M.D.

*Reimbursement for Psychiatric Care*

Laurence Miller, M.D.

*RBRVS, Codes and Reimbursement*

Gregory G. Harris, M.D.

*Telepsychiatry*

James H. Shore, M.D.

#### Council on International Psychiatry

Bernardo Ng, M.D.

#### Council on Medical Education and Lifelong Learning

Mark H. Rapaport, M.D.

*Scientific Program*

Linda Worley, M.D.

*Scientific Program—IPS*

Michael T. Compton, M.D., M.P.H.

*Vestermark Award Committee*

Lowell D. Tong, M.D.

#### Council on Minority Mental Health and Health Disparities

Christina V. Mangurian, M.D.

#### Council on Psychiatry and Law

Debra A. Pinals, M.D.

*Judicial Action*

Marvin S. Swartz, M.D.

#### Council on Psychosomatic Medicine (Consultation Liaison Psychiatry)

David F. Gitlin, M.D.

#### Council on Quality Care

Grayson Norquist, M.D.

*Mental Health Information Technology*

Brent Nelson, M.D.

*Performance Measures*

Karen Pierce, M.D.

*Practice Guidelines*

Michael J. Vergare, M.D.

#### Council on Research

Dwight L. Evans, M.D.

*Psychiatric Dimensions of Disasters*

Robert J. Ursano, M.D.

# Go Online

Visit [ajp.psychiatryonline.org](http://ajp.psychiatryonline.org) for these features!

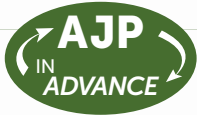

## AJP in Advance

*Discover the latest research advances before they appear in print*

### The 20-Year Longitudinal Trajectories of Social Functioning in Individuals With Psychotic Disorders

Poorer social functioning across the 20 years after first admission for a psychotic disorder was associated with other unfavorable real-world outcomes. Psychotic mood disorders had better social functioning overall than schizophrenia spectrum disorders. Differences in social functioning were similar in childhood.

### Rare Genome-Wide Copy Number Variation and Expression of Schizophrenia in 22q11.2 Deletion Syndrome

Schizophrenia risk in 22q11.2 deletion syndrome is associated with additional rare copy number variations outside the 22q11.2 deletion region, supporting a multigenic hypothesis for schizophrenia.

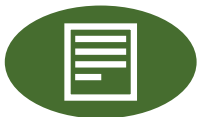

## AJP CME

*Earn CME credit: 3 courses per issue*

This month's courses appear on pages 1023–1026. Each short course is based on one article in this issue and can earn up to 1 *AMA PRA Category 1 Credit*<sup>™</sup>. CME credit is issued only **online**, and a paid subscription to AJP's CME course program is required.

Visit [psychiatryonline.org/cme](http://psychiatryonline.org/cme) and click on the "American Journal of Psychiatry" tab.

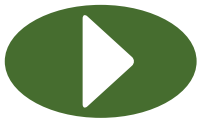

## AJP Multimedia

*Access Audio or Video for highlights of each issue*

In AJP Audio this month, Deputy Editor Susan K. Schultz, M.D., discusses the efficacy of psychodynamic therapy, the protective effect of pregnancy on the risk for drug abuse, the relation of ovarian hormone levels to symptoms in premenstrual dysphoric disorder, rates of mortality and self-harm in patients taking clozapine, and pharmacogenomic testing in psychiatry.

In this month's video, Deputy Editor Daniel S. Pine, M.D., discusses the articles "Psychodynamic Therapy: As Efficacious as Other Empirically Supported Treatments? A Meta-Analysis Testing Equivalence of Outcomes" and "Genetic Heterogeneity in Depressive Symptoms Following the Death of a Spouse: Polygenic Score Analysis of the U.S. Health and Retirement Study."

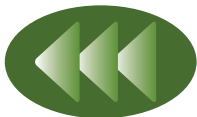

## History of Psychiatry

*Revisit the field's rich history through the pages of AJP*

### 100 years ago this month: "A Wider Field of Activity for the Association"

In the October 1917 issue, Dr. James V. May and others discuss an expanding role for APA. Among other things, Dr. May argues that "the Association should be the most powerful factor in the country in obtaining state recognition of the needs of the insane, in fostering legislation which will prevent political interference with the hospitals, and in bringing the standards of care up to the high plane represented by ideals kept constantly before the public by this organization since its foundation in 1844."

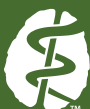



# The Residents' JOURNAL

## The American Journal of Psychiatry Residents' Journal

September 2017

Volume 12

Issue 9

### Inside

- 2 Disorders in Children and Adolescents: Challenges in Diagnosis and Treatment With an Emphasis on Neurodevelopmental Disorders**  
Shawn E. McNeil, M.D.  
*Focusing attention on the importance of identifying patterns of pathology that present prior to adulthood*
- 3 Pediatric Pharmacologic Management of Autism-Associated Behavioral Dysregulation**  
Willa Xiong, M.D.  
*Examining FDA-approved and off-label pharmacotherapies, other antipsychotics and agents, and advanced management considerations*
- 6 General Practitioners' Knowledge of a Local First-Episode Psychosis Treatment Program**  
Sarah Adams, H.BA, MSc., M.B. B.Ch., BAO  
Marrison Stranks, H.BSc., M.Sc.  
*Assessing practitioners' knowledge of patient eligibility criteria*
- 9 Sensory Processing and Genetic Expression Similarities in Autism and Schizophrenia**  
Shariq F. Haque, M.D.  
*Exploring a possible association between schizophrenia spectrum disorder and autism*
- 11 Stimulant Overprescribing, Abuse, and Diversion**  
Saeed Ahmed, M.D.  
Sanya Virani, M.D.  
*Analyzing misdiagnosis and inappropriate prescribing resulting in addiction, as well as untoward side effects and prescription number extrapolation*
- 13 The Utility of Neuroscience in Educating Families About Adolescent Mental Health**  
Bharat Reddy Sampathi, B.A.  
*Emphasizing the importance of linking brain circuits and brain function into treatment planning to create an avenue for better communication with parents*
- 14 Integrity Versus Despair as Illustrated in the Film Youth**  
Reviewed by Knushminder Chahal, M.D.
- 15 Residents' Resources**
- 16 Author Information**

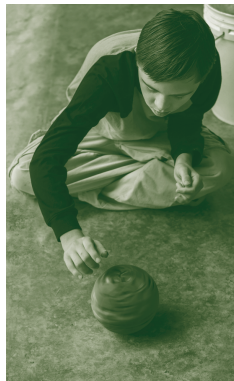

© Shutterstock.com

#### EDITOR-IN-CHIEF

Rachel Katz, M.D.

#### SENIOR DEPUTY EDITOR

Oliver Glass, M.D.

#### DEPUTY EDITOR

Anna Kim, M.D.

#### ASSOCIATE EDITORS

Erin Fulchiero, M.D.

Helena Winston, M.D.

#### MEDIA EDITOR

Shawn E. McNeil, M.D.

#### CULTURE EDITOR

Michelle Liu, M.D.

#### STAFF EDITOR

Angela Moore

#### EDITORS EMERITI

Katherine Pier, M.D.

Rajiv Radhakrishnan, M.B.B.S., M.D.

Misty Richards, M.D., M.S.

Arshya Vahabzadeh, M.D.

Monifa Seawell, M.D.

Sarah M. Fayad, M.D.

Joseph M. Cerimele, M.D.

Molly McVoy, M.D.

Sarah B. Johnson, M.D.

**Editor-in-Chief**  
Rachel Katz, M.D.

**Senior Deputy Editor**  
Oliver Glass, M.D.

**Deputy Editor**  
Anna Kim, M.D.

**Associate Editors**  
Erin Fulchiero, M.D.  
Helena Winston, M.D.

The *Residents' Journal*, the largest and most robust resident-led journal in the house of medicine, is an e-publication that serves as a forum to share your ideas and experiences in training, clinical practice, research, and careers with your colleagues.

To submit a manuscript, please visit [mc.manuscriptcentral.com/appi-ajp](http://mc.manuscriptcentral.com/appi-ajp) and select a manuscript type for AJP Residents' Journal. You may submit a commentary (500 words), book review (500 words), history of psychiatry (500 words), clinical case conference (1,250 words), review article (1,500 words), treatment in psychiatry article (1,500 words), research article (1,250 words), drug review (1,500 words), or letter to the editor (250 words).

If you are interested in serving as a Guest Section Editor for the *Residents' Journal*, please send your CV, and your ideas for topics, to the Editor-in-Chief ([rachel.katz@yale.edu](mailto:rachel.katz@yale.edu)).

To access the complete Residents' Journal archives, visit [ajp.psychiatryonline.org/loi/ajp-rj](http://ajp.psychiatryonline.org/loi/ajp-rj)

# Quality Books from RCPsych Publications

## The Female Mind: A User's Guide

Edited by Kathryn M. Abel and Rosalind Ramsay

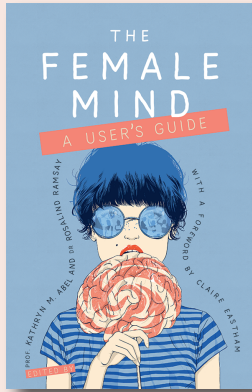

What does it mean to be a woman in the modern world? How does our understanding of the different roles and expectations placed on women affect us in our day-to-day life and interactions? And what to do if it all becomes just a bit too much...?

The editors of *The Female Mind: A User's Guide* have asked their colleagues, women and men, from various healthcare professions and women with lived experience of mental illness to attempt to answer those questions. What emerged is a guide of 35 chapters that empowers women in navigating the different states, emotions and conversations around their mental health, and enables men to understand what life might

be like for their sisters, partners and friends. The book's diverse range of topics spans anxiety, motherhood, eating disorders, what it means to grow up as a woman, and living positively with mental illness. It gives helpful tips and lists useful resources, and draws on a wide number of incredible stories from women's lives, from teenagers to mature women, and includes inspirational accounts from women who lead satisfying lives despite sometimes struggling with mental illness.

In her foreword to the book, Claire Eastham, the popular mental health blogger behind *We're All Mad Here*, calls it 'a friendly guided tour of a woman's brain'. We hope it will become just that to all who read it.

Relevant for: anyone interested in women's mental health.

Sep 2017, paperback, 260 pages, ISBN 978-1-909726-80-2, price \$27.98

## Where There Is No Psychiatrist A Mental Health Care Manual (2nd edn)

Vikram Patel and Charlotte Hanlon

Mental health problems profoundly affect the quality of life, physical health and livelihoods of people all around the world. This is the second edition of one of the most widely used practical manuals of mental health care for general health workers, particularly those in low- and middle-income countries and low-resource settings of high-income countries.

Following an introduction to mental ill health, the book describes over 30 clinical problems and uses a problem-solving approach to guide readers through their assessment and management. It examines the mental health issues associated with particular settings and how to integrate mental health care with other activities in these settings, such as in refugee camps and schools.

Some chapters in the manual can be personalised for the reader's own location and situation. The book contains many illustrations, case studies and other helpful resources.

Relevant for: anyone who works in a healthcare environment, but who does not have specialist training in mental health problems.

Oct 2017, paperback, 282 pages, ISBN 978-1-909726-83-3, price \$20

## Management for Psychiatrists (4th edn)

Edited by Dinesh Bhugra, Stuart Bell and Alistair Burns

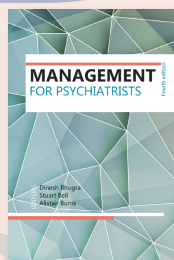

This is a practical guide to the complex world of management in psychiatric practice and covers the various skills necessary for running services, plus personal development skills.

Relevant for: advanced trainees and new consultants.

Sep 2016, paperback, 544 pages, ISBN 978-1-909726-65-9, price \$90

## The Drug Conversation How to Talk to Your Child About Drugs

Owen Bowden-Jones

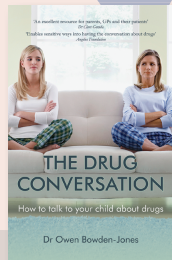

An essential guide for parents about how to raise the thorny issue of drugs with their children. It will help you begin a useful conversation about drugs with your child.

Relevant for: all parents will need this book at some stage.

May 2016, paperback, 180 pages, ISBN 978-1-909726-57-4, price \$25.98

## Modern Management of Perinatal Psychiatric Disorders (2nd edn)

Carol Henshaw, John Cox and Joanne Barton

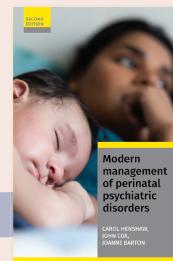

This is a comprehensive overview of mental health problems associated with pregnancy and the year after delivery. The second edition has been updated to reflect current practice, recent evidence and new clinical guidelines.

Relevant for: all psychiatrists and other healthcare professionals who work with pregnant women or new mothers.

April 2017, paperback, 320 pages, ISBN 978-1-909726-77-2, price \$70

RCPsych Publications titles can be bought within North America from:

Publishers Storage and Shipping Company, 46 Development Road, Fitchburg, MA 01420.

Tel: 978 829 2560. Fax: 978 348 1233. Email: [orders@pssc.com](mailto:orders@pssc.com)

Many titles can also be ordered through [www.amazon.com](http://www.amazon.com) and [www.barnesandnoble.com](http://www.barnesandnoble.com)

(RCPsych Publications is the name given to books published by the Royal College of Psychiatrists in the United Kingdom. For our full list of over 120 titles see: [www.rcpsych.ac.uk/books](http://www.rcpsych.ac.uk/books))

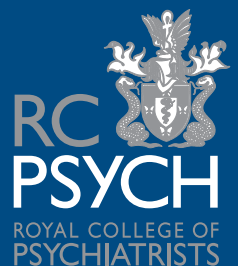

# APA Seeks Editor-in-Chief for The American Journal of Psychiatry

The American Psychiatric Association (APA) is seeking applicants for the position of Editor of its official journal, *The American Journal of Psychiatry*. The current Editor concludes his final term on December 31, 2018.

The Editor is responsible for

- maintaining an overall plan/model concerning format and overall editorial direction of content published by the *Journal*
- nominating members of the Editorial Board and working with them in preparing and implementing policy, content directions, and procedures
- soliciting contributions from highly respected voices of authority in subject areas of interest to the field
- overseeing and ensuring the rigorous and equitable peer review of manuscripts—selecting reviewers, monitoring modifications of revised and resubmitted manuscripts, and making disposition decisions—in a process that is facilitated by an online manuscript tracking system and editorial staff
- organizing the content of each issue
- planning and implementing new features as appropriate
- keeping abreast of ongoing changes and advances in scientific and medical journal publishing, such as quality assurance and accountability and issues of scientific integrity

The position of Editor is a part-time position (20–30%). Most work is done via the Internet and telephone.

Applicants must be APA members with significant publishing and editorial experience.

Applications are due to the Search Committee by **November 1, 2017**. Candidates should submit their curriculum vitae and a cover letter outlining their vision for *The American Journal of Psychiatry* and their qualifications to realize this vision. Application materials should be sent by e-mail to the Search Committee c/o the journal's Executive Editor, Michael Roy (mroy@psych.org).

AMERICAN  
PSYCHIATRIC  
ASSOCIATION

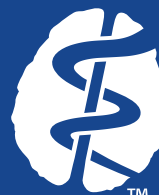

Source: http://ajp.psychiatryonline.org/doi/suppl/10.1176/ajp.2017.174.issue-10/suppl_file/front.pdf
